# Supplementary material for: ‘Old Is Gold’: How Traditional Indian Dietary Practices Can Support Pediatric Diabetes Management
Source: MDPI journal article supplement (doi:10.3390/nu13124427), 2021-12-10
Supplement: s1 [file s1]

**Supplementary Table S1:** Common Indian preparations with grains that increase nutritive value and lower glycemic index (GI) [1].

| Recipe                                                               | Method of preparation                                                                                                                                                                                             |
|----------------------------------------------------------------------|-------------------------------------------------------------------------------------------------------------------------------------------------------------------------------------------------------------------|
| Curd Rice                                                            | Curd (yogurt) added to cooked rice; tempered with peanuts, curry leaves, mustard seeds and asafoetida in a little oil                                                                                             |
| Lemon Rice                                                           | Lemon juice squeezed onto cooked rice; tempered with peanuts, other nuts, curry leaves, turmeric, mustard seeds and asafoetida in a little oil                                                                    |
| Tamarind Rice                                                        | Tamarind pulp added to cooked rice; tempered with peanuts, other nuts, pomegranate, curry leaves, turmeric, mustard seeds and asafoetida in a little oil                                                          |
| Tomato Rice                                                          | Rice cooked with tomatoes, onions, garlic, curry leaves, and asafoetida                                                                                                                                           |
| <i>Masale Bhaat/<br/>Podnichi bhaat</i>                              | Leftover rice cooked with vegetables; tempered with peanuts, curry leaves, turmeric, mustard seeds and asafoetida in a little oil                                                                                 |
| Vegetable Pulao                                                      | Rice cooked with vegetables and spices                                                                                                                                                                            |
| Coconut Rice                                                         | Grated coconut and roasted nuts added to tempered cooked rice                                                                                                                                                     |
| <i>Pakhala/ pazhaya<br/>saadam/ paniwala<br/>chawal/ panta bhaat</i> | Cooked rice soaked in plenty of water and fermented overnight; spiced with curd/lemon, salt, mint leaves, crushed ginger; consumed along with the superfluent water                                               |
| Biryani                                                              | Rice slow cooked with vegetables/ meat/ egg/ fish/ cottage cheese, and fragrantly spiced                                                                                                                          |
| <i>Poha/ Chuda Upma</i>                                              | Soaked rice flakes cooked with vegetables, sprouts, peanuts, turmeric, and onions; with fresh lemon juice squeezed on top                                                                                         |
| <i>Dadpe Pohe</i>                                                    | Raw poha or flattened rice mixed with chopped onions, tomatoes, grated carrots; moistened with juices from the vegetables; then tempered with mustard seeds, asafoetida, peanuts and curry leaves in a little oil |
| <i>Chuda Dahi</i>                                                    | Soaked rice flakes mixed with curd, cottage cheese, grated coconut, jaggery                                                                                                                                       |
| Rice Seviyan                                                         | Rice vermicelli cooked with vegetables, peanuts; tempered with mustard seeds, and curry leaves in a little oil.                                                                                                   |
| <i>Bhel/ Jhalmuri</i>                                                | Puffed rice with peanuts, onion, tomatoes, chillies, mashed potato, roasted split bengal gram, coriander leaves                                                                                                   |
| <i>Rice Puttu</i>                                                    | Rice flour steamed with grated fresh coconut                                                                                                                                                                      |
| <i>Appam</i>                                                         | Pancakes with rice and coconut batter                                                                                                                                                                             |
| <i>Poha chivda</i>                                                   | Roasted rice flakes tempered with mustard, curry leaves and peanuts                                                                                                                                               |
| <i>Panki</i>                                                         | Batter of rice flour, curd and spices spread between banana leaves and steamed                                                                                                                                    |
| <i>Phodnichi poli/<br/>Roti churma/ Seyal mani</i>                   | Leftover <i>chapatis</i> crushed and tempered with spices, vegetables and peanuts                                                                                                                                 |

|                                 |                                                                                                                                                                                                        |
|---------------------------------|--------------------------------------------------------------------------------------------------------------------------------------------------------------------------------------------------------|
| Semolina <i>upma</i>            | Salted thick porridge of wheat semolina with vegetables, split dals and nuts                                                                                                                           |
| Broken wheat <i>upma</i>        | Salted thick porridge of broken wheat with vegetables, split dals and nuts                                                                                                                             |
| <i>Roti nu shak</i>             | Leftover chapatis cooked with garlic and buttermilk                                                                                                                                                    |
| Stuffed <i>parathas</i>         | Vegetables, cottage cheese or minced meats stuffed in whole wheat flour dough, rolled into <i>chapati</i> like flatbreads, then cooked with oil on a griddle                                           |
| <i>Thepla</i>                   | Thin flatbread made from fresh fenugreek leaves and whole-grain flours (mixture of whole wheat and gram flour)                                                                                         |
| <i>Kathi</i> rolls              | Skewered meats, or cottage cheese, or vegetable-sprouts mixture, wrapped in a <i>paratha</i>                                                                                                           |
| Egg roll                        | Egg wraps (wrap made of whole wheat flour)                                                                                                                                                             |
| <i>Muthiya</i>                  | Steamed dumplings made using whole wheat flour, chickpea flour, fenugreek leaves, grated bottle gourd, salt, turmeric, chili powder; tempered with seasoning                                           |
| Millet <i>idli</i>              | Steamed millet cakes made with fermented batter of rice and whole pulses in the ratio 3:1; eaten with pulse & vegetable curry ( <i>sambhar</i> ) and coconut/ roasted dal chutney with spices and ghee |
| Millet <i>upma</i>              | Salted thick porridge of millet with vegetables, split dals and nuts                                                                                                                                   |
| Millet <i>chapati</i>           | Flatbread made from millets                                                                                                                                                                            |
| <i>Bajra millet koozh</i>       | Pearl millet flour cooked with chopped shallots and buttermilk                                                                                                                                         |
| <i>Bajre ki khatte raabdi</i>   | Pearl millet flour mixed with curd; cooked with spices                                                                                                                                                 |
| <i>Gujarati Methi Na Dhebra</i> | Multigrain millet <i>paratha</i> made from sorghum and pearl millet; flavoured with fenugreek leaves and spices.                                                                                       |

**Supplementary Table S2:** Some common Indian preparations with pulses with high nutritive value and low glycemic index (GI)

| <b>Recipe</b>                         | <b>Method of preparation</b>                                                                                                                                          |
|---------------------------------------|-----------------------------------------------------------------------------------------------------------------------------------------------------------------------|
| <i>Dal</i>                            | Pulse curry tempered with spices                                                                                                                                      |
| <i>Sambhar</i>                        | Pulse-based vegetable curry cooked with pigeon pea and tamarind                                                                                                       |
| <i>Dahi Kadhi</i>                     | Savoury vegetable curry made with gram flour and curd gravy                                                                                                           |
| <i>Sindhi Kadhi</i>                   | Gravy made from chickpea flour, vegetables and tamarind pulp                                                                                                          |
| <i>Pakorás</i>                        | Deep fried sliced vegetables/ nuts/ <i>paneer</i> / meat/ fish after coating in a thick spiced up gram flour batter                                                   |
| <i>Khaman dhokla</i>                  | Steamed savoury cakes made from fermented gram flour and curd batter                                                                                                  |
| <i>Khandvi</i>                        | Steamed savoury rolls made from fermented gram flour and curd batter                                                                                                  |
| <i>Gatte ki sabji</i>                 | Gram flour roundels added to a curd-based gravy                                                                                                                       |
| <i>Papad</i>                          | Green gram and black gram flour rolled into thin spiced and seasoned discs, dried and stored. Freshly roasted or fried before consuming as an accompaniment with food |
| <i>Chana jor, moong jor</i>           | Spiced, flattened and roasted black gram, chickpea or green gram                                                                                                      |
| <i>Chana chaat, ghoggni and ragda</i> | Boiled dried white peas or gram seasoned with spices; and added onion, tomatoes and raw mango                                                                         |
| <i>Dhansak/ dal ghosht</i>            | Pulses cooked with vegetables and/ or sometimes meat                                                                                                                  |
| <i>Dalma</i>                          | Pulse cooked with vegetables, raw papaya and spices                                                                                                                   |
| <i>Kootu</i>                          | Pulse and vegetable (bottle gourd, pumpkin, carrot, cabbage) curry                                                                                                    |
| <i>Saag dal</i>                       | Pulse and green leafy vegetable                                                                                                                                       |

**Supplementary Table S3:** Some common Indian recipes with cereal pulse combinations

| <b>Recipe</b>                                                              | <b>Method of preparation</b>                                                                                                                                                                              |
|----------------------------------------------------------------------------|-----------------------------------------------------------------------------------------------------------------------------------------------------------------------------------------------------------|
| <i>Vegetable khichdi</i>                                                   | Rice/ millets and pulses cooked together with vegetables                                                                                                                                                  |
| <i>Pongal</i>                                                              | Rice/ millets and pulses cooked together with vegetables                                                                                                                                                  |
| <i>Idli</i>                                                                | Steamed rice/ millet cakes made with fermented batter of rice and whole pulses in the ratio 3:1; eaten with pulse vegetable curry ( <i>sambhar</i> ) and coconut/ dal <i>chutney</i> with spices and ghee |
| <i>Dosa</i>                                                                | Crepes made with fermented batter of rice/ millets and whole pulses in the ratio 3:1; eaten with <i>sambhar</i> and coconut/ dal <i>chutney</i> with spices and ghee                                      |
| <i>Paniyaaram</i>                                                          | Ball shaped dumplings made by steaming fermented batter of cereal/ millet flour and ground pulses using a mould                                                                                           |
| <i>Dhokla</i>                                                              | Steamed cakes made with fermented batter of rice/ millets, pulse flour and sour curd. The cakes are tempered with curry leaves and mustard seeds                                                          |
| <i>Dal baati</i>                                                           | Pulse curry consumed with roasted whole wheat flour balls                                                                                                                                                 |
| <i>Zunka or pitla bhakar</i>                                               | Chickpea flour or horse gram flour gravy consumed with rice/ millet flour <i>rotis</i>                                                                                                                    |
| <i>Handvo</i>                                                              | Steamed savoury cake made using rice, pulses and vegetables.                                                                                                                                              |
| <i>Dal dhokli</i>                                                          | Pulse curry cooked with raw whole wheat flour <i>chapati</i> , peanuts and vegetables                                                                                                                     |
| <i>Thalipect</i>                                                           | Flatbread made from whole-grain flours (rice, millets) and pulses with onions                                                                                                                             |
| <i>Puttu kadala</i>                                                        | Steamed rice/ millet flour and coconut log consumed with <i>kadala kari</i> (black chickpea curry)                                                                                                        |
| <i>Dal or Sattu paratha</i>                                                | Wheat flour dough is stuffed with sattu/ roasted chickpea flour, onion, grated ginger and green chillies                                                                                                  |
| <i>Dal Rice/ Sambhar rice/ Pulse curry rice (Rajma rice or chole rice)</i> | Cooked pulse curry consumed with steamed rice                                                                                                                                                             |
| <i>Bisi bele bhaath</i>                                                    | Rice and pulses cooked with vegetables, mainly carrot, beans and various spices                                                                                                                           |
| <i>Dhirde</i>                                                              | Pancake made from cereals/ millets and pulses or one grain/legume, onion, tomatoes, turmeric powder, cumin seeds, green chillies, salt, coriander leaves                                                  |

**Supplementary Table S4:** Some examples of commonly consumed beverages of India [1-3]

| <b>Beverage and preparation method</b>                                                                                                                                                                                | <b>Nutritional highlights</b>                                                                    | <b>Special mention</b>          |
|-----------------------------------------------------------------------------------------------------------------------------------------------------------------------------------------------------------------------|--------------------------------------------------------------------------------------------------|---------------------------------|
| <i>Jal jeera</i> : Roasted cumin powder, ginger, black pepper powder, salt and mint, in water                                                                                                                         | Stimulates appetite<br>Provides cooling effect<br>Is a good digestive                            |                                 |
| <i>Aam Pora</i> : Roasted raw mango pulp, roasted cumin powder, sugar, mint leaves, salt, in water                                                                                                                    | Good appetizer.<br>Glucose lowering properties                                                   | Added sugar must be minimized   |
| <i>Sattu</i> drink: <i>Sattu</i> (roasted chickpea/ barley flour), roasted cumin powder, black salt, lemon in water.                                                                                                  | Low GI<br>Rich in protein, fiber, minerals                                                       |                                 |
| Salted <i>Lassi</i> : Curd, roasted cumin powder, mint and coriander leaves, salt, blended in water.                                                                                                                  | Good probiotic<br>Aids digestion<br>Good thirst quencher                                         | Avoid sweet <i>lassi</i>        |
| <i>Kanji</i> : Black carrots, spiced with ground mustard seeds, red chilli powder, black salt. All ingredients mixed with boiled and cooled water, kept in the sunshine in a glass jar for 2-4 days for fermentation. | Low GI<br>Natural probiotic<br>Rich in antioxidants.<br>Helps correct hyponatremia in the summer |                                 |
| <i>Nannari</i> : Root extracts of <i>Decalepis hamiltonii</i> blended with lime, in water                                                                                                                             | Aid in metabolism<br>Rich in antioxidants                                                        |                                 |
| Tender coconut water                                                                                                                                                                                                  | Natural electrolyte source<br>Rich in potassium<br>Helps maintain hydration                      | Consume when BG well controlled |
| Kashmiri <i>Kahwa</i> : Green tea, cardamom, cinnamon, saffron, almond slivers boiled in water.                                                                                                                       | Provides warmth in winter.<br>Excellent beverage to soothe the nerves<br>Aids digestive health   | Avoid/ minimize added sugar     |
| <i>Torani</i> : Superfluent water from overnight soaked cooked rice ( <i>pakhala</i> )                                                                                                                                | Natural probiotic drink<br>Ensures hydration<br>Provides essential minerals and nutrients        |                                 |
| <i>Rasam</i> : Soup made with dal water, tomato and spices                                                                                                                                                            | Good remedy for common cold and viral infections<br>Low GI, low carbohydrates, low calories.     |                                 |

**Supplementary Table S5:** Some examples of festive foods of India [1,4,5]

| Food Items                                                                                                                                                                                                                                                                                                                       | Nutritional Highlights                                                                                                                                                                | Proposed Modification                                                                                                           |
|----------------------------------------------------------------------------------------------------------------------------------------------------------------------------------------------------------------------------------------------------------------------------------------------------------------------------------|---------------------------------------------------------------------------------------------------------------------------------------------------------------------------------------|---------------------------------------------------------------------------------------------------------------------------------|
| <i>Mahaprasad</i> : Green gram, black chickpeas & unpolished rice soaked overnight; mixed with fresh coconut, salt, sugar & fresh seasonal fruits                                                                                                                                                                                | Good source of resistant starch & medium chain fatty acids                                                                                                                            | Carbohydrate content and GI can be lowered by exclusion of sugar                                                                |
| <i>Bevubella</i> or <i>Ugadi Pachadi</i> : Mixture of neem flowers, grated raw mango, tamarind, pepper powder, jaggery, salt                                                                                                                                                                                                     | Neem contains several chemical compounds like epoxyazadiradine (lowers BG), flavonoids, tannins, galic acid etc. which provide antioxidant effects                                    | Amount of jaggery can be reduced to lower GI and carb content.                                                                  |
| <i>Khichuri</i> and <i>Labda</i> : Porridges made with unpolished rice, yellow lentils, cumin, salt, and different types of vegetables.                                                                                                                                                                                          | Complete, wholesome, nutritious meal<br>Rich in fiber, good quality protein, micronutrients, polyphenolic compounds, and antioxidants.<br>GI kept low by added lentils and vegetables |                                                                                                                                 |
| <i>Jil Pitha</i> : Chicken curry mixed with rice flour into a paste, spread uniformly on sal leaves, carefully sealed with neem twigs, and steamed in a mud vessel. The leaves are removed before serving.                                                                                                                       | Protein rich<br>Nutrients preserved by steam cooking.                                                                                                                                 |                                                                                                                                 |
| <i>Shirni</i> : Milk, sugar, whole wheat flour, banana blended well; served with added nuts.                                                                                                                                                                                                                                     | Quickly, easily made.<br>Added nuts provide healthy fats.                                                                                                                             | Sugar can be excluded;<br>Low fat milk helps reduce calorie count                                                               |
| <i>Dodhikorma</i> : Popped rice ( <i>khoi</i> ), flattened rice ( <i>poha</i> ), sweetened curd ( <i>mishti doi</i> ), curd, sugar drops ( <i>batasha</i> ), sweets ( <i>sandesh/ rasogolla</i> ), sugar, ripe banana, shredded coconut, cashew nuts, raisins, dates, seasonal fruit mixed together, made into big <i>ladoos</i> | Complete, wholesome, nutritious recipe<br>Rich in good quality protein, carbohydrates and fats.                                                                                       | Sugar can be excluded<br>Proportion of sweets, raisins, sweet curd, and ripe banana can be reduced to lower carb content and GI |
| <i>Nombu Kanji</i> : Porridge made from broken rice/rice grits, yellow lentil, vegetables, mutton/ chicken (optional), fenugreek seeds, grated coconut/ coconut milk, onion, tomato, spices and green chillies                                                                                                                   | Complete, wholesome meal<br>Packed with macro- and micronutrients<br>Low GI<br>Improve gut health                                                                                     | Can be modified by adding seasonal vegetables, and drumstick leaves which enhance nutritional value                             |

|                                                                                                                                                                                                            |                                                                                 |                                                                |
|------------------------------------------------------------------------------------------------------------------------------------------------------------------------------------------------------------|---------------------------------------------------------------------------------|----------------------------------------------------------------|
| <i>Gustaba</i> : Minced mutton mixed with aniseed & ginger powder, salt, rolled into balls and steamed. The steamed balls are cooked in a gravy of curd, garlic, cinnamon, cardamom, onion and <i>ghee</i> | Good source of protein & minerals.<br>In cold climate, helps keep the body warm | Nutritional value can be enhanced with addition of vegetables. |
|------------------------------------------------------------------------------------------------------------------------------------------------------------------------------------------------------------|---------------------------------------------------------------------------------|----------------------------------------------------------------|

1. Nambiar, V. *Indian Food Anthropology and The Eat Right Movement*. , 1st ed.; Selective & Scientific Books: 2021.
2. Evans, S.F.; Meister, M.; Mahmood, M.; Eldoumi, H.; Peterson, S.; Perkins-Veazie, P.; Clarke, S.L.; Payton, M.; Smith, B.J.; Lucas, E.A. Mango supplementation improves blood glucose in obese individuals. *Nutr Metab Insights* **2014**, *7*, NMI. S17028.
3. Sarkar, P.; DH, L.K.; Dhumal, C.; Panigrahi, S.S.; Choudhary, R. Traditional and ayurvedic foods of Indian origin. *Journal of Ethnic Foods* **2015**, *2*, 97-109.
4. Islas, J.F.; Acosta, E.; G-Buentello, Z.; Delgado-Gallegos, J.L.; Moreno-Treviño, M.G.; Escalante, B.; Moreno-Cuevas, J.E. An overview of Neem (*Azadirachta indica*) and its potential impact on health. *Journal of Functional Foods* **2020**, *74*, 104171, doi:<https://doi.org/10.1016/j.jff.2020.104171>.
5. Ganesan, K.; Xu, B. Polyphenol-Rich Lentils and Their Health Promoting Effects. *International journal of molecular sciences* **2017**, *18*, doi:10.3390/ijms18112390.
